# Supplementary material
Source: publisher site journal article supplement (https://www.dovepress.com/article/579505)
Supplement: Supplementary file 1 [file 579505%20Supplementary%20Material.pdf]

**Supplementary Table 1.1. Exact p-values for comparisons of IOP, SE, CDVA at each postoperative time point versus baseline.**

| Variable | Day 1 vs Pre | Week 1 vs Pre | Month 1 vs Pre | Month 3 vs Pre |
|----------|--------------|---------------|----------------|----------------|
| IOP      | 1.0000       | 1.0000        | 1.0000         | 1.0000         |
| SE       | <0.0001      | <0.0001       | <0.0001        | <0.0001        |
| UDVA     | <0.0001      | <0.0001       | <0.0001        | <0.0001        |
| CDVA     | <0.0001      | <0.0001       | <0.0001        | <0.0001        |

**Supplementary Table 1.2. Exact p-values for comparisons of IOP, SE, CDVA between postoperative time points.**

| Variable | Week 1 vs Day 1 | Month 1 vs Day 1 | Month 3 vs Day 1 | Month 1 vs Week 1 | Month 3 vs Week 1 | Month 3 vs Month 1 |
|----------|-----------------|------------------|------------------|-------------------|-------------------|--------------------|
| IOP      | 0.8539          | 1.0000           | 1.0000           | 0.5721            | 1.0000            | 1.0000             |
| SE       | 1.0000          | 1.0000           | 1.0000           | 1.0000            | 1.0000            | 1.0000             |
| CDVA     | 1.0000          | 1.0000           | 1.0000           | 1.0000            | 1.0000            | 1.0000             |

SE, spherical equivalent; CDVA, corrected distance visual acuity; IOP, intraocular pressure

**Supplementary Table 2.1. Exact p-values for comparisons of RT at each postoperative time point versus baseline.**

| Region     | Day 1 vs Pre | Week 1 vs Pre | Month 1 vs Pre | Month 3 vs Pre |
|------------|--------------|---------------|----------------|----------------|
| Global     | 0.2347       | 0.0002        | 0.0002         | <0.0001        |
| Foveal     | 0.5483       | 0.7345        | 0.0019         | 0.0019         |
| Parafoveal | 0.8439       | 0.0041        | 0.0031         | 0.0009         |
| Perifoveal | 0.1134       | <0.0001       | <0.0001        | <0.0001        |
| Temporal   | 0.2547       | 0.0008        | 0.0009         | <0.0001        |
| Superior   | 0.0366       | <0.0001       | <0.0001        | <0.0001        |
| Nasal      | 0.3681       | 0.0037        | 0.0030         | 0.0030         |
| Inferior   | 0.7124       | <0.0001       | 0.0002         | 0.0002         |

**Supplementary Table 2.2. Exact p-values for comparisons of RT between postoperative time points.**

| Region     | Week 1 vs Day 1 | Month 1 vs Day 1 | Month 3 vs Day 1 | Month 1 vs Week 1 | Month 3 vs Week 1 | Month 3 vs Month 1 |
|------------|-----------------|------------------|------------------|-------------------|-------------------|--------------------|
| Global     | 0.4071          | 0.4435           | 0.2224           | 1                 | 1                 | 1                  |
| Foveal     | 0.0022          | <0.0001          | <0.0001          | 0.5011            | 0.5057            | 1                  |
| Parafoveal | 0.6835          | 0.5720           | 0.2706           | 1                 | 1                 | 1                  |

|                |        |        |        |   |   |   |
|----------------|--------|--------|--------|---|---|---|
| Perifovea<br>l | 0.3662 | 0.5126 | 0.2406 | 1 | 1 | 1 |
| Temporal       | 0.8146 | 0.8728 | 0.0884 | 1 | 1 | 1 |
| Superior       | 0.3767 | 0.5216 | 0.2637 | 1 | 1 | 1 |
| Nasal          | 1      | 1      | 1      | 1 | 1 | 1 |
| Inferior       | 0.0782 | 0.1293 | 0.1075 | 1 | 1 | 1 |

RT, retinal thickness;

**Supplementary Table 3.1. Exact p-values for comparisons of MVD at each postoperative time point versus baseline.**

| Region     | Day 1 vs Pre | Week 1 vs Pre | Month 1 vs Pre | Month 3 vs Pre |
|------------|--------------|---------------|----------------|----------------|
| Global     | 1.0000       | 1.0000        | 1.0000         | <0.0001        |
| Foveal     | 1.0000       | 1.0000        | 0.6936         | <0.0001        |
| Parafoveal | 1.0000       | 1.0000        | 1.0000         | 0.0028         |
| Perifoveal | 1.0000       | 1.0000        | 1.0000         | <0.0001        |
| Temporal   | 1.0000       | 1.0000        | 1.0000         | 0.0197         |
| Superior   | 1.0000       | 1.0000        | 0.4628         | <0.0001        |
| Nasal      | 1.0000       | 1.0000        | 1.0000         | <0.0001        |
| Inferior   | 1.0000       | 1.0000        | 1.0000         | 0.0381         |

**Supplementary Table 3.2. Exact p-values for comparisons of MVD between postoperative time points.**

| Region         | 1 day vs 1 week | 1 day vs 1 month | 1 day vs 3 months | 1 week vs 1 month | 1 week vs 3 months | 1 month vs 3 months |
|----------------|-----------------|------------------|-------------------|-------------------|--------------------|---------------------|
| Global         | 1.0000          | 1.0000           | 0.0007            | 1.0000            | <0.0001            | 0.0030              |
| Foveal         | 1.0000          | 1.0000           | 0.0034            | 0.7349            | <0.0001            | 0.0695              |
| Parafovea<br>l | 1.0000          | 1.0000           | 0.2262            | 1.0000            | 0.0096             | 0.1288              |
| Perifovea<br>l | 1.0000          | 1.0000           | <0.0001           | 1.0000            | <0.0001            | 0.0007              |
| Temporal       | 1.0000          | 1.0000           | 0.3997            | 1.0000            | 0.0072             | 0.2263              |
| Superior       | 1.0000          | 1.0000           | 0.0122            | 1.0000            | 0.0020             | 0.1503              |
| Nasal          | 1.0000          | 1.0000           | <0.0001           | 1.0000            | <0.0001            | 0.0033              |
| Inferior       | 1.0000          | 1.0000           | 0.0379            | 1.0000            | <0.0001            | 0.0035              |

MVD, macular vessel density;

**Supplementary Table 4.1. Exact p-values for comparisons of MSmVD at each postoperative time point versus baseline.**

| Region     | Day 1 vs Pre | Week 1 vs Pre | Month 1 vs Pre | Month 3 vs Pre |
|------------|--------------|---------------|----------------|----------------|
| Global     | 1            | 1             | 0.0869         | <0.0001        |
| Foveal     | 1            | 1             | 0.69           | <0.0001        |
| Parafoveal | 1            | 1             | 1              | 0.0028         |
| Perifoveal | 1            | 1             | <0.0001        | <0.0001        |
| Temporal   | 1            | 1             | 1              | 0.020          |
| Superior   | 1            | 1             | 0.46           | 0.0001         |
| Nasal      | 1            | 1             | 1              | <0.0001        |
| Inferior   | 1            | 1             | 1              | 0.038          |

**Supplementary Table 4.2. Exact p-values for comparisons of MSmVD between postoperative time points.**

| Region     | 1 day vs 1 week | 1 day vs 1 month | 1 day vs 3 months | 1 week vs 1 month | 1 week vs 3 months | 1 month vs 3 months |
|------------|-----------------|------------------|-------------------|-------------------|--------------------|---------------------|
| Global     | 1               | 1                | 0.0007            | 1                 | <0.0001            | 0.0030              |
| Foveal     | 1               | 1                | 0.0034            | 0.73              | <0.0001            | 0.069               |
| Parafoveal | 1               | 1                | 0.23              | 1                 | 0.0096             | 0.13                |
| Perifoveal | 1               | 1                | <0.0001           | 1                 | <0.0001            | 0.0007              |
| Temporal   | 1               | 1                | 0.0051            | 1                 | <0.0001            | 0.0014              |
| Superior   | 1               | 0.9726           | <0.0001           | 0.6112            | <0.0001            | <0.0001             |
| Nasal      | 1               | 0.1004           | <0.0001           | 0.1823            | <0.0001            | <0.0001             |
| Inferior   | 1               | 1                | <0.0001           | 1                 | <0.0001            | <0.0001             |

MSmVD, macular small vessel density;

**Supplementary Table 5.1. Exact p-values for comparisons of SVD at each postoperative time point versus baseline.**

| Region     | Day 1 vs Pre | Week 1 vs Pre | Month 1 vs Pre | Month 3 vs Pre |
|------------|--------------|---------------|----------------|----------------|
| Global     | 0.6171       | 0.9824        | 0.9556         | <0.0001        |
| Foveal     | 0.9999       | 0.9991        | 0.9996         | 0.2634         |
| Parafoveal | 0.9982       | 0.9994        | 0.9992         | <0.0001        |
| Perifoveal | 0.3195       | 0.9828        | 0.8365         | <0.0001        |
| Temporal   | 0.9620       | 0.8770        | 0.9996         | 0.0445         |
| Superior   | 0.8750       | 0.9885        | 0.3398         | <0.0001        |
| Nasal      | 0.9217       | 0.8823        | 0.4762         | <0.0001        |
| Inferior   | 0.4201       | 0.1769        | 0.7355         | <0.0001        |

**Supplementary Table 5.2. Exact p-values for comparisons of SVD between postoperative time points.**

| Region     | 1 day vs 1 week | 1 day vs 1 month | 1 day vs 3 months | 1 week vs 1 month | 1 week vs 3 months | 1 month vs 3 months |
|------------|-----------------|------------------|-------------------|-------------------|--------------------|---------------------|
| Global     | 0.9099          | 0.2127           | <0.0001           | 0.7238            | <0.0001            | <0.0001             |
| Foveal     | 0.9999          | 0.9999           | 0.2038            | 0.9999            | 0.1643             | 0.1789              |
| Parafoveal | 0.9999          | 0.9819           | <0.0001           | 0.9900            | <0.0001            | <0.0001             |
| Perifoveal | 0.6621          | 0.0283           | <0.0001           | 0.5120            | <0.0001            | <0.0001             |
| Temporal   | 0.9987          | 0.9896           | 0.0054            | 0.9440            | 0.0021             | 0.0251              |
| Superior   | 0.6032          | 0.0402           | <0.0001           | 0.6506            | <0.0001            | <0.0001             |
| Nasal      | 0.3971          | 0.1008           | <0.0001           | 0.9588            | <0.0001            | <0.0001             |
| Inferior   | 0.9877          | 0.9877           | <0.0001           | 0.8598            | <0.0001            | <0.0001             |

SVD, superficial vessel density

**Supplementary Table 6.1. Exact p-values for comparisons of DVD at each postoperative time point versus baseline.**

| Region     | Day 1 vs Pre | Week 1 vs Pre | Month 1 vs Pre | Month 3 vs Pre |
|------------|--------------|---------------|----------------|----------------|
| Global     | 0.9605       | 0.9597        | 0.0466         | 0.8199         |
| Foveal     | 1.0000       | 0.8487        | 0.2131         | <0.0001        |
| Parafoveal | 0.8685       | 0.9831        | 0.9865         | 0.9105         |
| Perifoveal | 0.9881       | 0.8795        | 0.0078         | 0.3599         |
| Temporal   | 1.0000       | 0.9108        | 0.8852         | 0.9135         |
| Superior   | 0.5830       | 0.8254        | 0.8828         | 1.0000         |
| Nasal      | 0.9422       | 1.0000        | 0.2178         | 0.6647         |
| Inferior   | 0.9991       | 0.1685        | 0.0007         | 0.0364         |

**Supplementary Table 6.2. Exact p-values for comparisons of DVD between postoperative time points.**

| Region     | 1 day vs 1 week | 1 day vs 1 month | 1 day vs 3 months | 1 week vs 1 month | 1 week vs 3 months | 1 month vs 3 months |
|------------|-----------------|------------------|-------------------|-------------------|--------------------|---------------------|
| Global     | 0.6500          | 0.0056           | 0.4022            | 0.2311            | 0.9951             | 0.4456              |
| Foveal     | 0.8033          | 0.1770           | <0.0001           | 0.8047            | 0.0006             | 0.0301              |
| Parafoveal | 0.9929          | 0.5770           | 1.0000            | 0.8326            | 1.0000             | 0.6477              |
| Perifoveal | 0.6045          | 0.0013           | 0.1412            | 0.1161            | 0.9029             | 0.5539              |
| Temporal   | 0.8814          | 0.8516           | 0.9376            | 1.0000            | 0.4267             | 0.3854              |
| Superior   | 0.9943          | 0.1154           | 0.4999            | 0.2678            | 0.7562             | 0.9297              |
| Nasal      | 0.9766          | 0.0347           | 0.2217            | 0.1536            | 0.5555             | 0.9415              |
| Inferior   | 0.2746          | 0.0018           | 0.0714            | 0.3955            | 0.9716             | 0.7856              |

DVD, deep vessel density;

**Supplementary Table 7.1. Exact p-values for comparisons of CT at each postoperative time point versus baseline.**

| Region     | Day 1 vs Pre | Week 1 vs Pre | Month 1 vs Pre | Month 3 vs Pre |
|------------|--------------|---------------|----------------|----------------|
| Global     | <0.0001      | <0.0001       | 0.2181         | 0.0547         |
| Foveal     | 0.0002       | 0.0074        | 0.0903         | 1.0000         |
| Parafoveal | <0.0001      | <0.0001       | 0.1262         | 0.2058         |
| Perifoveal | <0.0001      | <0.0001       | 0.4396         | 0.0505         |
| Temporal   | <0.0001      | <0.0001       | 0.7866         | 0.0390         |
| Superior   | <0.0001      | <0.0001       | 0.0623         | 0.1536         |
| Nasal      | <0.0001      | <0.0001       | 0.3991         | 0.2570         |
| Inferior   | <0.0001      | 0.0005        | 1.0000         | 0.0759         |

**Supplementary Table 7.2. Exact p-values for comparisons of DVD between postoperative time points.**

| Region     | Week 1 vs Day 1 | Month 1 vs Day 1 | Month 3 vs Day 1 | Month 1 vs Week 1 | Month 3 vs Week 1 | Month 3 vs Month 1 |
|------------|-----------------|------------------|------------------|-------------------|-------------------|--------------------|
| Global     | 1.0000          | 0.0015           | <0.0001          | 0.0585            | <0.0001           | <0.0001            |
| Foveal     | 1.0000          | 0.9912           | <0.0001          | 1.0000            | <0.0001           | 0.0008             |
| Parafoveal | 1.0000          | 0.1093           | <0.0001          | 0.5242            | <0.0001           | <0.0001            |
| Perifoveal | 1.0000          | 0.0005           | <0.0001          | 0.0323            | <0.0001           | <0.0001            |
| Temporal   | 1.0000          | 0.0005           | <0.0001          | 0.1209            | <0.0001           | <0.0001            |
| Superior   | 1.0000          | 0.0304           | <0.0001          | 0.1220            | <0.0001           | 0.0000             |
| Nasal      | 1.0000          | 0.0189           | <0.0001          | 0.0473            | <0.0001           | 0.0002             |
| Inferior   | 1.0000          | 0.0005           | <0.0001          | 0.0915            | <0.0001           | 0.0004             |

CT, choroidal thickness

**Supplementary Table 8.1. Exact p-values for comparisons of CVI at each postoperative time point versus baseline.**

| Region     | Day 1 vs Pre | Week 1 vs Pre | Month 1 vs Pre | Month 3 vs Pre |
|------------|--------------|---------------|----------------|----------------|
| Global     | 1.0000       | 1.0000        | 1.0000         | 1.0000         |
| Foveal     | 1.0000       | 1.0000        | 0.1257         | 0.0203         |
| Parafoveal | 1.0000       | 1.0000        | 0.3578         | 0.1130         |
| Perifoveal | 1.0000       | 1.0000        | 1.0000         | 1.0000         |
| Temporal   | 1.0000       | 0.9029        | 0.0873         | 1.0000         |

|          |        |        |        |        |
|----------|--------|--------|--------|--------|
| Superior | 1.0000 | 1.0000 | 0.4374 | 1.0000 |
| Nasal    | 0.1200 | 0.9960 | 1.0000 | 1.0000 |
| Inferior | 0.0562 | 0.5772 | 1.0000 | 0.9530 |

**Supplementary Table 8.2. Exact p-values for comparisons of CVI between postoperative time points.**

| Region      | Week 1 vs Day 1 | Month 1 vs Day 1 | Month 3 vs Day 1 | Month 1 vs Week 1 | Month 3 vs Week 1 | Month 3 vs Month 1 |
|-------------|-----------------|------------------|------------------|-------------------|-------------------|--------------------|
| Global      | 1.0000          | 0.0430           | 0.4688           | 0.5392            | 1.0000            | 1.0000             |
| Foveal      | 1.0000          | 0.0282           | 0.0035           | 0.5214            | 0.1125            | 1.0000             |
| Parafovea 1 | 1.0000          | 0.0195           | 0.0042           | 0.2225            | 0.0654            | 1.0000             |
| Perifovea 1 | 1.0000          | 0.1586           | 1.0000           | 1.0000            | 1.0000            | 1.0000             |
| Temporal    | 1.0000          | 1.0000           | 1.0000           | 1.0000            | 1.0000            | 0.1136             |
| Superior    | 1.0000          | 0.3255           | 1.0000           | 1.0000            | 1.0000            | 1.0000             |
| Nasal       | 1.0000          | 0.0063           | 0.0006           | 0.1053            | 0.0166            | 1.0000             |
| Inferior    | 1.0000          | 1.0000           | 1.0000           | 1.0000            | 1.0000            | 1.0000             |

CVI, choroidal vascularity index

**Supplementary Table 9.1. Exact p-values for comparisons of OVD at each postoperative time point versus baseline.**

| Region            | Day 1 vs Pre | Week 1 vs Pre | Month 1 vs Pre | Month 3 vs Pre |
|-------------------|--------------|---------------|----------------|----------------|
| Global            | 1            | 1             | 0.3465         | <0.0001        |
| Nasal-superior    | 1            | 1             | 1              | 0.0306         |
| Nasal-inferior    | 1            | 1             | 1              | <0.0001        |
| Inferonasal       | 0.2382       | 1             | 1              | 0.0006         |
| Inferotemporal    | 1            | 1             | 0.0023         | <0.0001        |
| Temporal-inferior | 1            | 1             | 0.0274         | <0.0001        |
| Temporal-superior | 1            | 1             | 0.0016         | <0.0001        |
| Superotemporal    | 1            | 1             | 0.0180         | <0.0001        |
| Superonasal       | 1            | 1             | 1              | 0.1037         |

**Supplementary Table 9.2. Exact p-values for comparisons of OVD between postoperative time points.**

| Region | Week 1 vs Day 1 | Month 1 vs Day 1 | Month 3 vs Day 1 | Month 1 vs Week 1 | Month 3 vs Week 1 | Month 3 vs Month 1 |
|--------|-----------------|------------------|------------------|-------------------|-------------------|--------------------|
|--------|-----------------|------------------|------------------|-------------------|-------------------|--------------------|

|                   |        |         |         |        |         |        |
|-------------------|--------|---------|---------|--------|---------|--------|
| Global            | 0.7298 | 0.0185  | <0.0001 | 1      | <0.0001 | 0.0001 |
| Nasal-superior    | 1      | 1       | 0.0236  | 1      | 0.1696  | 0.0283 |
| Nasal-inferior    | 1      | 1       | <0.0001 | 1      | 0.0034  | 0.0006 |
| Inferonasal       | 0.6957 | 0.0781  | <0.0001 | 1      | <0.0001 | 0.0031 |
| Inferotemporal    | 0.2607 | <0.0001 | <0.0001 | 0.0267 | <0.0001 | 1      |
| Temporal-inferior | 0.7074 | 0.0094  | <0.0001 | 1      | 0.0043  | 0.4337 |
| Temporal-superior | 1      | 0.0006  | <0.0001 | 0.0952 | <0.0001 | 0.4912 |
| Superotemporal    | 1      | 0.0027  | <0.0001 | 0.0673 | <0.0001 | 0.0103 |
| Superonasal       | 1      | 1       | <0.0001 | 1      | 0.0019  | 0.0153 |

OVD, peripapillary optic disc vessel density;

**Supplementary Table 10.1. Exact p-values for comparisons of OSmVD at each postoperative time point versus baseline.**

| Region            | Day 1 vs Pre | Week 1 vs Pre | Month 1 vs Pre | Month 3 vs Pre |
|-------------------|--------------|---------------|----------------|----------------|
| Global            | 0.2729       | 0.5458        | 1              | <0.0001        |
| Nasal-superior    | 1            | 0.1834        | 0.6893         | <0.0001        |
| Nasal-inferior    | 1            | 1             | 1              | <0.0001        |
| Inferonasal       | 0.3972       | 0.7268        | 0.0013         | <0.0001        |
| Inferotemporal    | 0.0019       | 1             | 1              | <0.0001        |
| Temporal-inferior | 1            | 1             | 1              | 1              |
| Temporal-superior | 1            | 1             | 1              | 0.4530         |
| Superotemporal    | 0.0054       | 1             | 1              | 1              |
| Superonasal       | 0.5012       | 0.8608        | 1              | <0.0001        |

**Supplementary Table 10.2. Exact p-values for comparisons of OSmVD between postoperative time points.**

| Region | Week 1 vs Day 1 | Month 1 vs Day 1 | Month 3 vs Day 1 | Month 1 vs Week 1 | Month 3 vs Week 1 | Month 3 vs Month 1 |
|--------|-----------------|------------------|------------------|-------------------|-------------------|--------------------|
| Global | 1               | 1                | 0.0009           | 1                 | 0.0003            | <0.0001            |

|                   |        |        |         |        |         |         |
|-------------------|--------|--------|---------|--------|---------|---------|
| Nasal-superior    | 1      | 1      | <0.0001 | 1      | 0.0004  | <0.0001 |
| Nasal-inferior    | 0.7365 | 0.9358 | <0.0001 | 1      | <0.0001 | <0.0001 |
| Inferonasal       | 1      | 0.7335 | <0.0001 | 0.4012 | <0.0001 | 0.0289  |
| Inferotemporal    | 0.0673 | 0.0046 | <0.0001 | 1      | 0.5624  | 1       |
| Temporal-inferior | 1      | 1      | 1       | 1      | 1       | 1       |
| Temporal-superior | 1      | 1      | 0.4119  | 1      | 0.4545  | 0.1670  |
| Superotemporal    | 0.0163 | 0.0015 | 0.0033  | 1      | 1       | 1       |
| Superonasal       | 1      | 1      | 0.0045  | 1      | 0.0018  | <0.0001 |

OSmVD, Peripapillary optic disc small vessel density;
